# Supplementary material for: Manganese–cobalt geomimetic materials for supercapacitor electrode
Source: Royal Society of Chemistry journal article supplement (doi:10.1039/d3dt03342b), 2023-11-23
Supplement: d3dt03342b1.pdf [file d3dt03342b1.pdf]

## SUPPLEMENTARY MATERIAL

### Manganese-Cobalt Geomimetic Materials for Supercapacitor Electrode

Tiphaine Tailliez<sup>a</sup>, Jacob Olchowka<sup>a,d\*</sup>, François Weill<sup>a</sup>, Sonia Buffière<sup>a</sup>, Marie-Anne Dourges<sup>b</sup>, Delphine Flahaut<sup>c,d</sup> and Liliane Guerlou-Demourgues<sup>a,d\*</sup>

<sup>a</sup>CNRS, Université de Bordeaux, Bordeaux INP, ICMCB - UMR 5026, F-33600 Pessac, France

<sup>b</sup>Institut des Sciences Moléculaires, Univ. Bordeaux, UMR 5255, F-33405 Talence, France

<sup>c</sup>CNRS, Université de Pau et des Pays de l'Adour, E2S UPPA, Institut des Sciences Analytiques et de Physicochimie pour l'Environnement et les Matériaux – UMR 5254, F-64000 Pau, France

<sup>d</sup>RS2E, Réseau Français sur le Stockage Electrochimique de l'Energie, FR CNRS 3459, F-80039 Amiens Cedex 1, France

\* Corresponding author

[liliane.guerlou-demourgues@ensmac.fr](mailto:liliane.guerlou-demourgues@ensmac.fr)

[jacob.olchowka@icmcb.cnrs.fr](mailto:jacob.olchowka@icmcb.cnrs.fr)

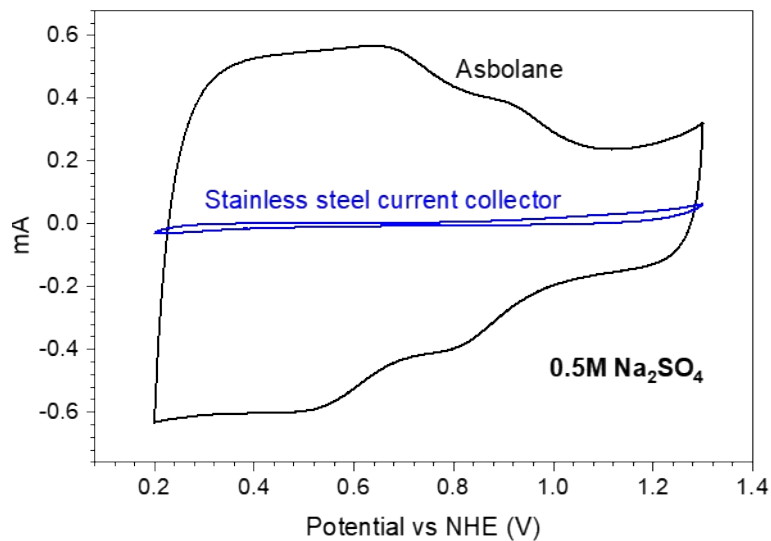

Figure S1 : Comparison of the CV curves of bare stainless-steel current collector with the one of Asbolane in 0.5M Na<sub>2</sub>SO<sub>4</sub> at 5 mV/s. The capacity of bare current collector, which is directly proportional to the area of the voltammogram is negligible (lower than 2%) compared to this of asbolane material.

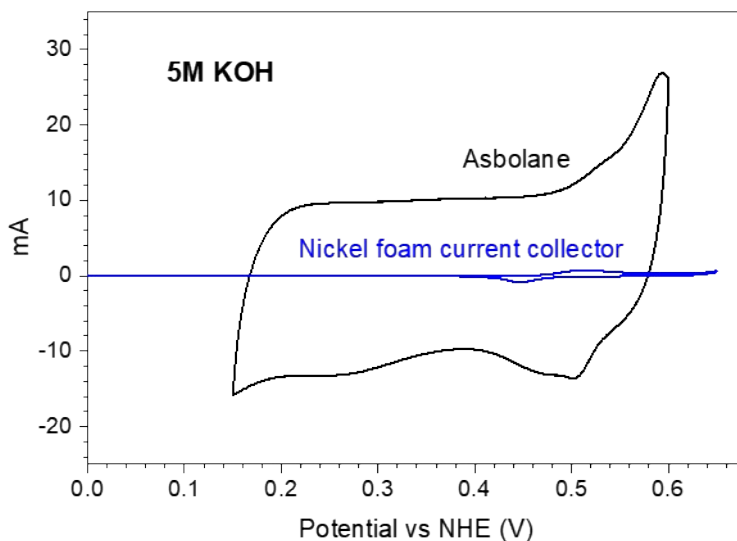

Figure S2 : Comparison of the CV curves of bare stainless-steel current collector with the one of Asbolane in 5M KOH at 10 mV/s. The capacity of bare current collector, which is directly proportional to the area of the voltammogram is negligible compared to this of asbolane material.

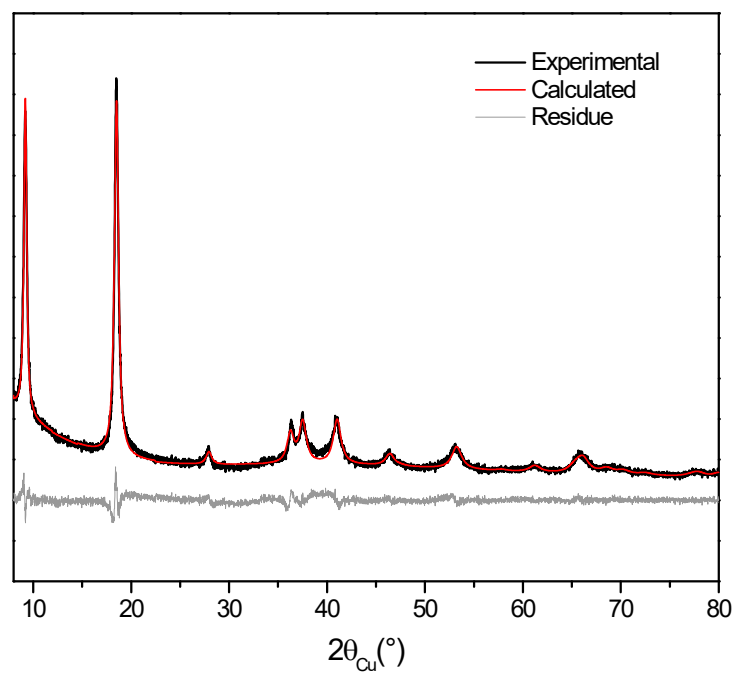

Figure S3 : Results of the Le Bail refinement for asbolane. The black curve corresponds to the experimental pattern and the red one to the calculated profile. The residue (grey curve) is also shown.

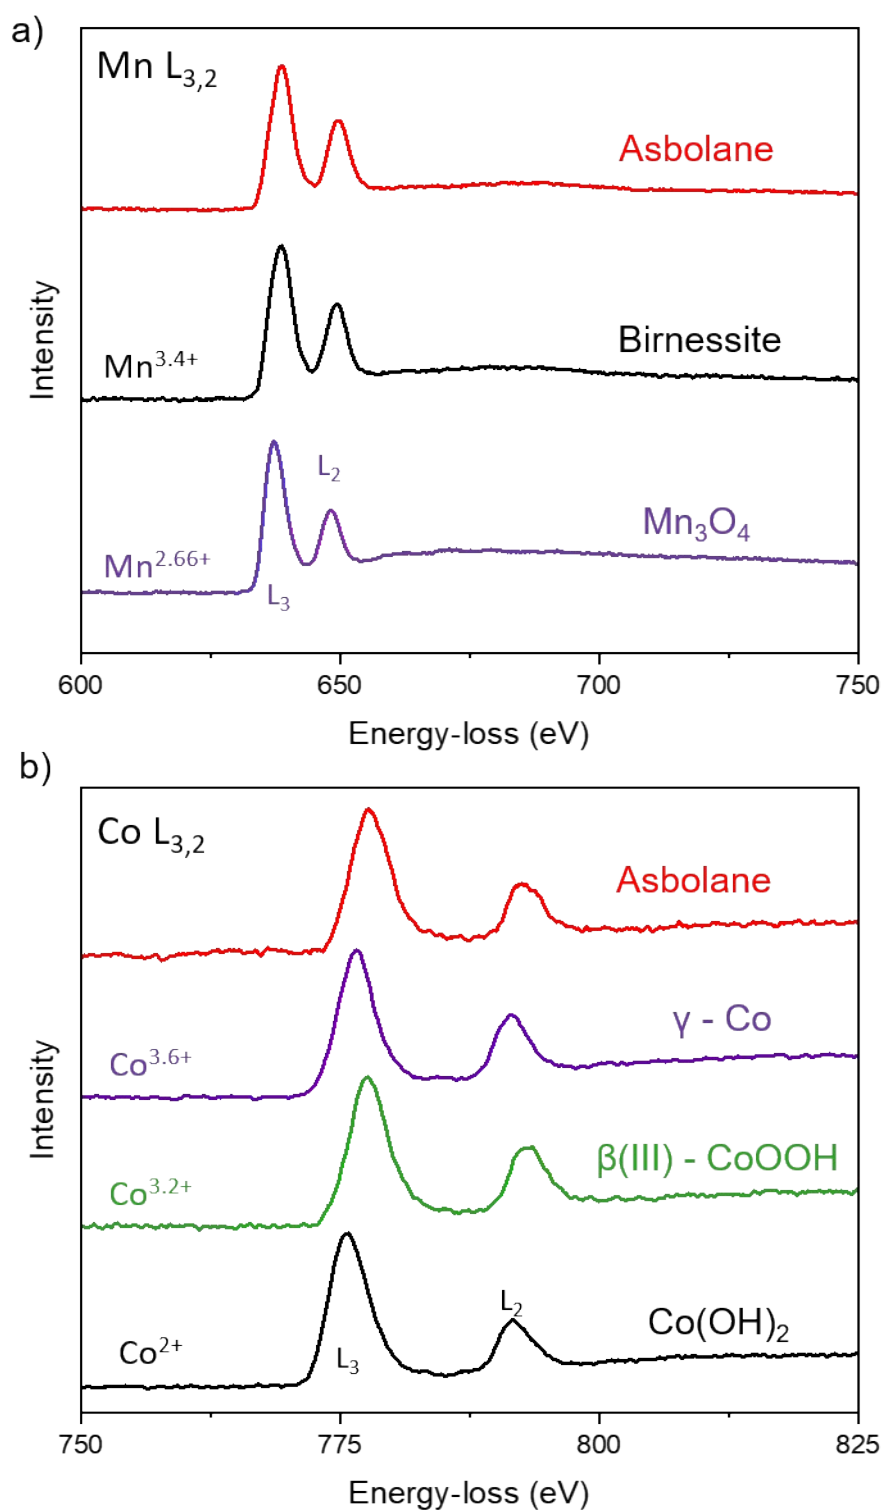

Figure S4 : Normalized EELS spectra for the references (Mn<sub>3</sub>O<sub>4</sub>, Birnessite, Co(OH)<sub>2</sub>,  $\beta$ (III)-CoOOH,  $\gamma$  - Co) and Asbolane phases for a) Mn L<sub>3,2</sub>, b) Co L<sub>3,2</sub> edges and c) Table listing the oxidation degree of each materials and the calculated values of the intensity ratio L<sub>3</sub>/L<sub>2</sub>.

|                                    | Oxidation degree                                                                         | L <sub>3</sub> /L <sub>2</sub> (Mn) Intensity | L <sub>3</sub> /L <sub>2</sub> (Co) Intensity |
|------------------------------------|------------------------------------------------------------------------------------------|-----------------------------------------------|-----------------------------------------------|
| <b>Mn<sub>3</sub>O<sub>4</sub></b> | Mn: +2.66                                                                                | 2.78                                          | /                                             |
| <b>Birnessite</b>                  | Mn: +3.4                                                                                 | 2.26                                          | /                                             |
| <b>Co(OH)<sub>2</sub></b>          | Co: +2                                                                                   | /                                             | 2.72                                          |
| <b>β(III) - CoOOH</b>              | Co: +3.2                                                                                 | /                                             | 2.31                                          |
| <b>γ- Co</b>                       | Co: +3.6                                                                                 | /                                             | 2.24                                          |
| <b>Asbolane</b>                    | Presence of Co <sup>2+</sup> , Co <sup>3+</sup> ,<br>Mn <sup>3+</sup> , Mn <sup>4+</sup> | 2.21                                          | 2.53                                          |

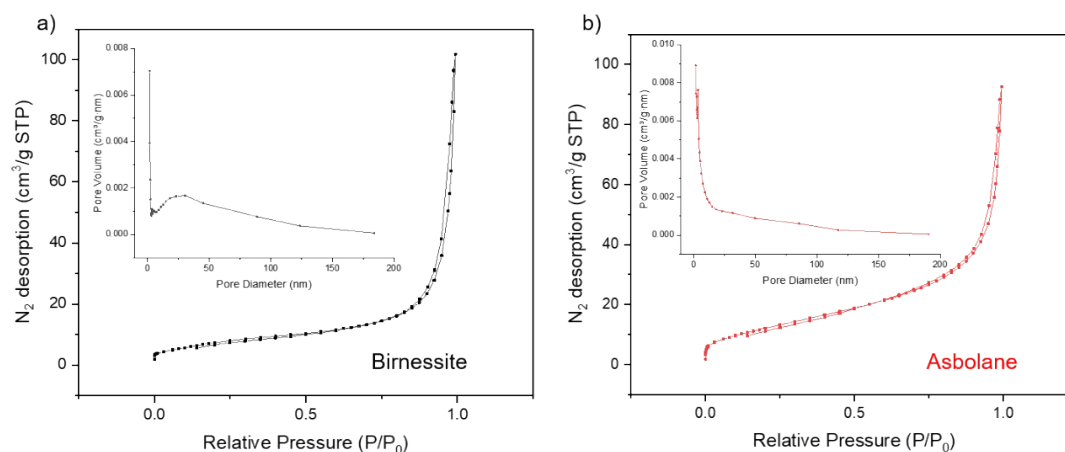

Figure S5 : N<sub>2</sub> adsorption/desorption isotherms obtained as well as the curves representing the pore size distribution as a function of their volume for a) Birnessite and b) Asbolane phases.

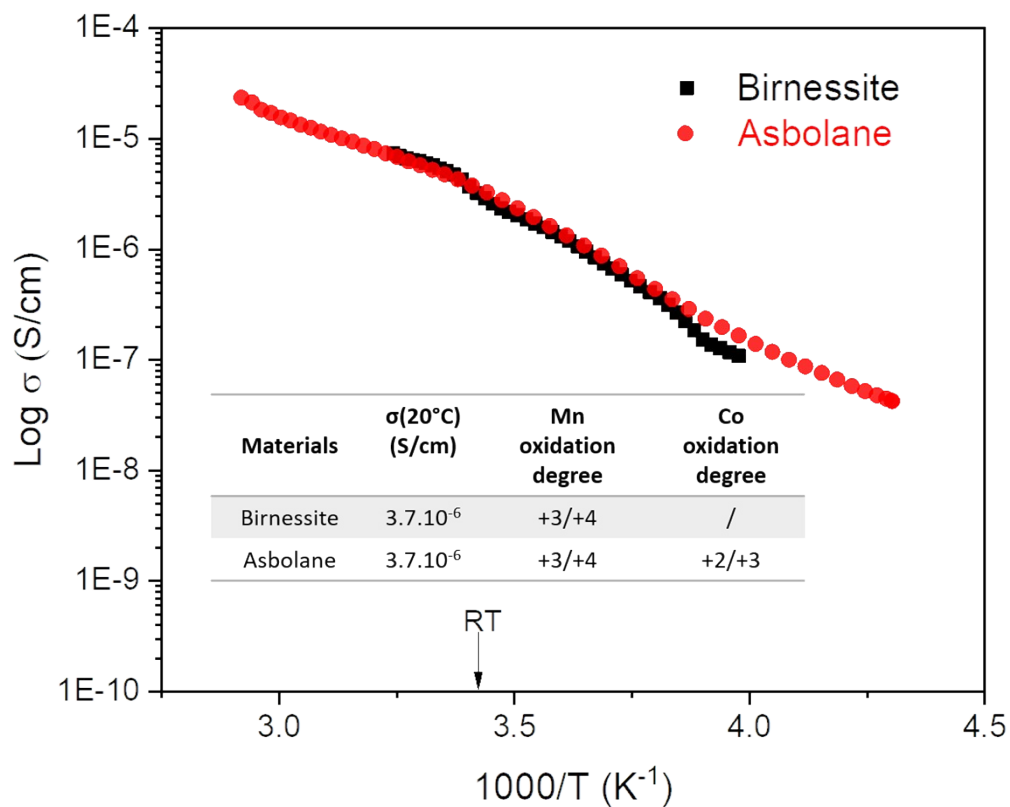

Figure S6 : Thermal variation of electronic conductivity and table summarizing the electronic conductivity values at 20°C as well as the oxidation degree of cobalt and manganese for Birnessite and Asbolane materials.

0.5M Na<sub>2</sub>SO<sub>4</sub>

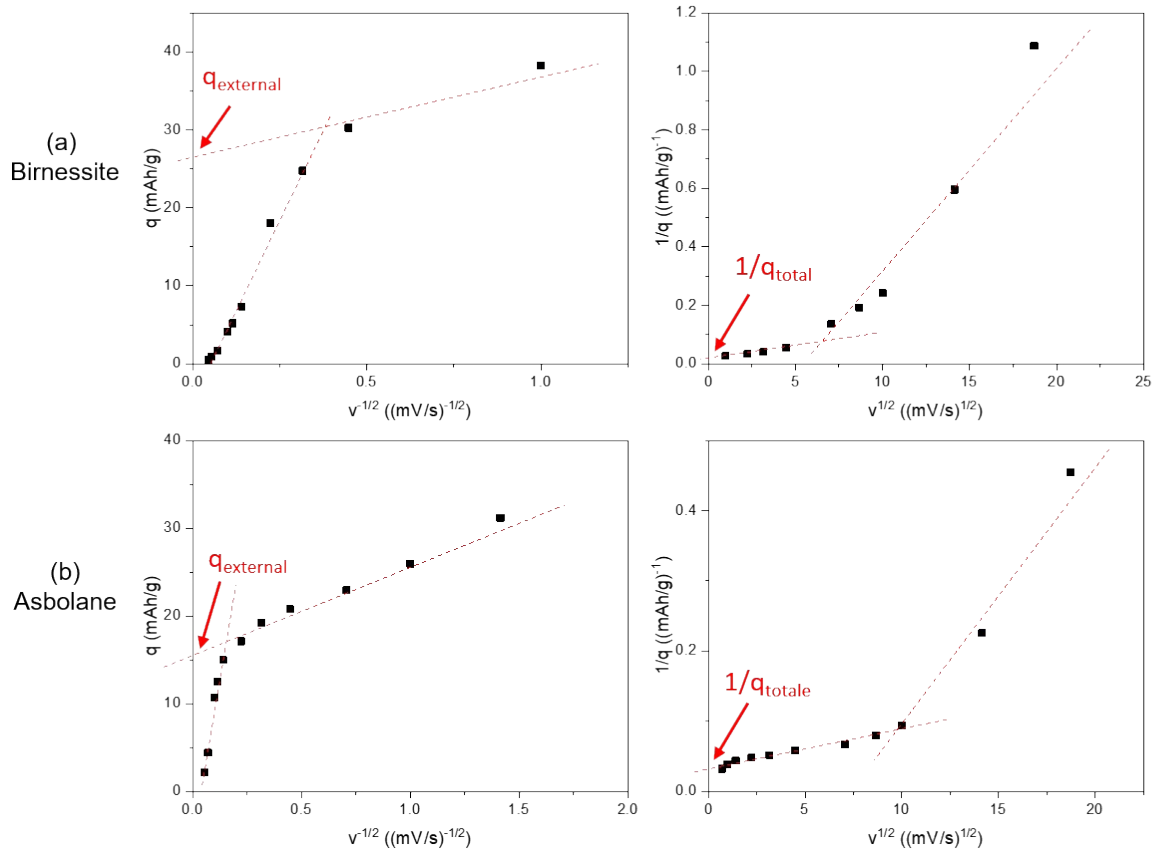

Figure S7 : Extrapolations at  $v \rightarrow +\infty$  of  $q = f(v^{-1/2})$  and at  $v \rightarrow 0$  of  $1/q = f(v^{1/2})$  for a) Birnessite and b) Asbolane materials for scan rates ranging from 0.5 to 350 mV/s in 0.5M Na<sub>2</sub>SO<sub>4</sub>.

### 5M KOH

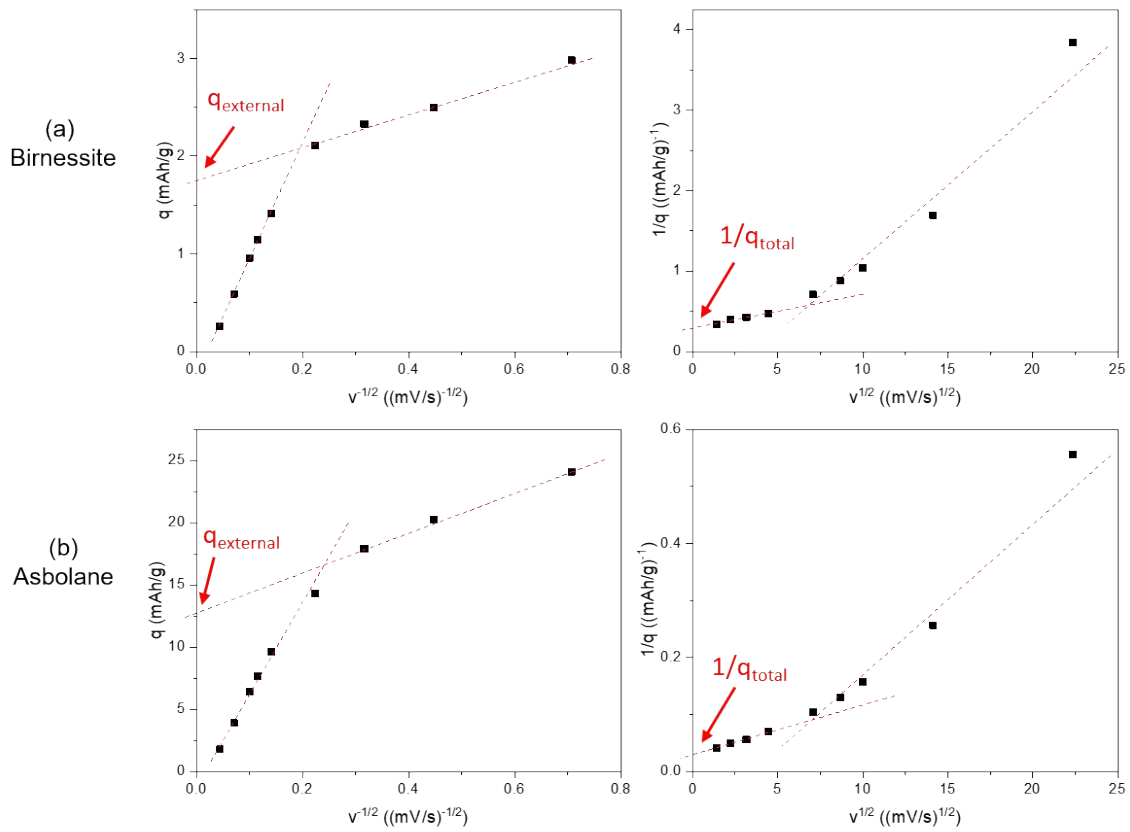

Figure S8 : Extrapolations at  $v \rightarrow +\infty$  of  $q = f(v^{-1/2})$  and at  $v \rightarrow 0$  of  $1/q = f(v^{1/2})$  for a) Birnessite and b) Asbolane materials for scan rates ranging from 2 to 500 mV/s in 5M KOH.



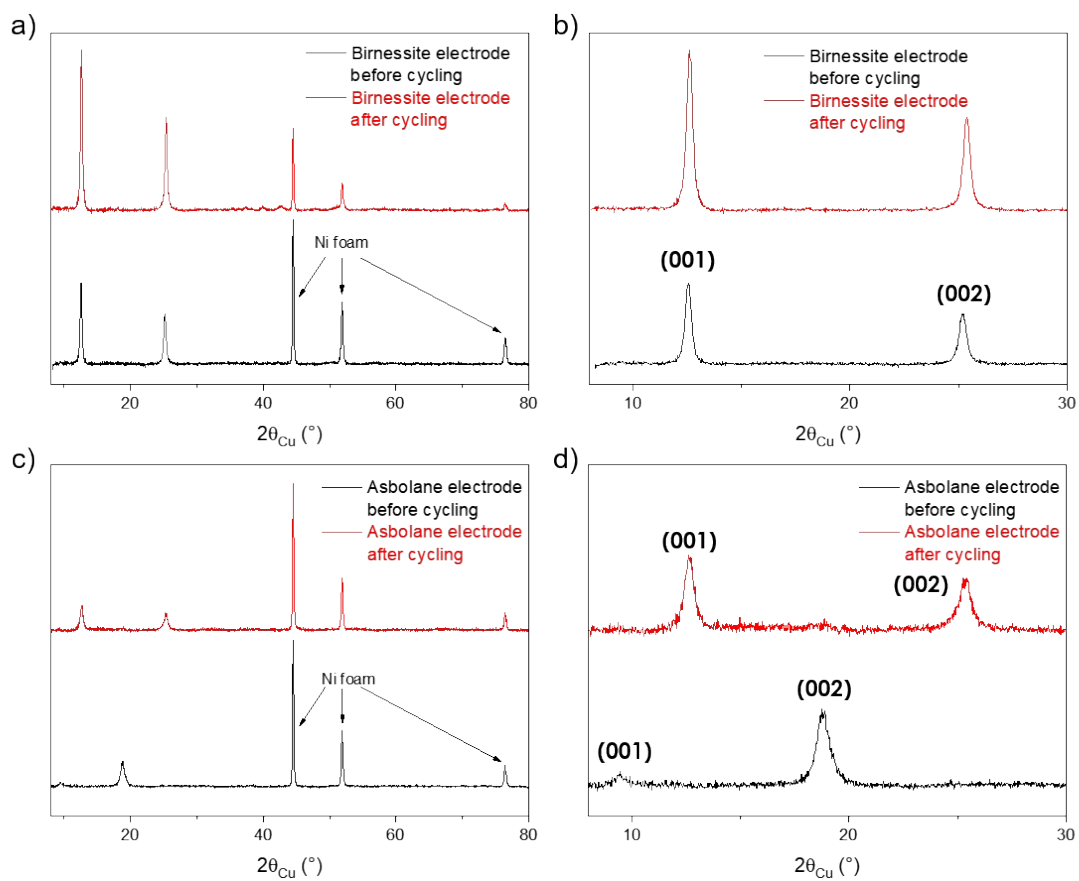

Figure S9 : X-ray diffractograms obtained before and after 3000 galvanostatic charge/discharge cycles at 1A/g in 5M KOH for a-b) Birnessite and c-d) Asbolane.

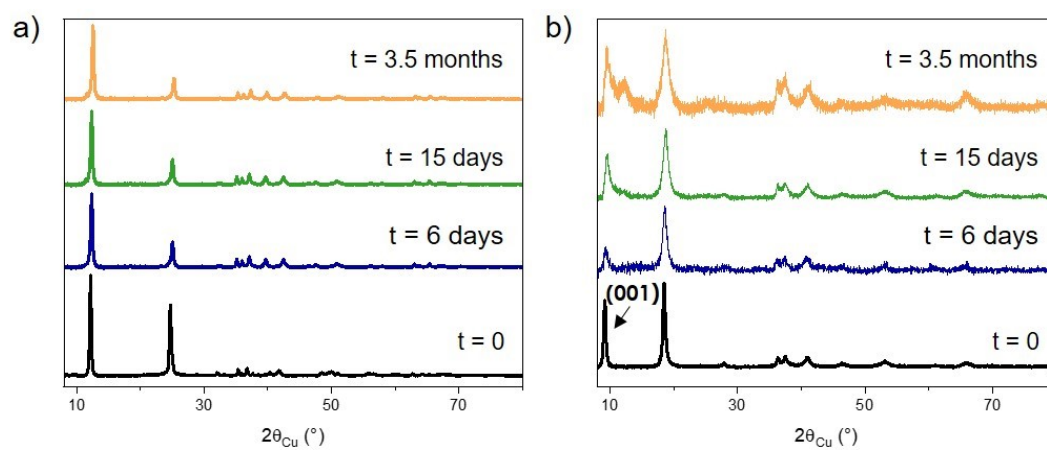

Figure S10 : X-ray diffractograms obtained before and after aging during 6 days, 15 days and 3.5 months in 5M KOH at room temperature for a) Birnessite and b) Asbolane materials.

Table S1 : Parameters used for simulating the X-ray diffraction profiles with the Diffax software.

|                                                                                                 | 2 layers model                                                                                                                                                                                      | 1 layer model                                                                                                   |
|-------------------------------------------------------------------------------------------------|-----------------------------------------------------------------------------------------------------------------------------------------------------------------------------------------------------|-----------------------------------------------------------------------------------------------------------------|
| Wavelength                                                                                      | $\lambda_{\text{Cu}} = 1.5406 \text{ \AA}$                                                                                                                                                          | $\lambda_{\text{Cu}} = 1.5406 \text{ \AA}$                                                                      |
| Point Group Symmetry                                                                            | -3M                                                                                                                                                                                                 | -3M                                                                                                             |
| Unit Cell Parameters                                                                            | $a = b = 2.84 \text{ \AA}$<br>$c = 9.6 \text{ \AA}$<br>$\alpha = \beta = 90^\circ$<br>$\gamma = 120^\circ$                                                                                          | $a = b = 2.84 \text{ \AA}$<br>$c = 9.6 \text{ \AA}$<br>$\alpha = \beta = 90^\circ$<br>$\gamma = 120^\circ$      |
| Instrumental Function                                                                           | Pseudo-Voigt<br>(Gaussian and Lorentzian contribution)                                                                                                                                              | Pseudo-Voigt<br>(Gaussian and Lorentzian contribution)                                                          |
| Atom Positions<br>Notation used:<br>Considered atom: x, y, z<br>and occupancy                   | MnO <sub>2</sub> layer = layer 1<br>O : 2/3 1/3 0.6 1<br>Mn : 0 0 0.5 1<br>O : 1/3 2/3 0.4 1<br><br>CoO <sub>2</sub> layer = layer 2<br>O : 2/3 1/3 0.6 1<br>Co : 0 0 0.5 0.55<br>O : 1/3 2/3 0.4 1 | Layer 1 :<br>O : 0 0 0.7 1<br>Co : 1/3 2/3 0.6 0.55<br>O : 2/3 1/3 0.5 1<br>Mn : 0 0 0.4 1<br>O : 1/3 2/3 0.3 1 |
| Translation Vectors<br>Notation used:<br>Transition probability,<br>$\vec{x}, \vec{y}, \vec{z}$ | Layer 1 to Layer 1<br>: 0 0 0 0<br>Layer 1 to Layer 2<br>: 1 0 0 $z_1$<br>Layer 2 to Layer 1<br>: 1 0 0 $z_2$<br>Layer 2 to Layer 2<br>: 0 0 0 0                                                    | Layer 1 to Layer 1<br>: 1 0 0 1                                                                                 |

Table S2: Binding Energies (eV) and atomic percentages (at. %) extracted from XPS data for Birnessite and Asbolane.

| Orbitals                  | Birnessite |       | Asbolane  |       |
|---------------------------|------------|-------|-----------|-------|
|                           | B.E. (eV)  | at. % | B.E. (eV) | at. % |
| C 1s                      | 285.0      | 13.7  | 285.0     | 17.7  |
|                           | 286.5      | 2.6   | 286.7     | 2.2   |
|                           | 288.6      | 1.9   | 288.8     | 2.3   |
|                           |            | 18.2  |           | 22.2  |
| O 1s                      | 530.0      | 39.5  | 530.4     | 27.7  |
|                           | 531.6      | 7.7   | 531.6     | 20.6  |
|                           | 533.0      | 3.1   | 532.8     | 6.0   |
|                           | 534.6      | 2.8   |           |       |
|                           |            | 53.2  |           | 54.3  |
| N 1s                      |            |       | 398.7     | 0.1   |
|                           |            |       | 400.3     | 0.2   |
|                           |            |       | 403.6     | 0.1   |
|                           |            |       | 407.2     | 0.7   |
|                           |            |       | 1.8       |       |
| Ni 2p                     |            |       |           |       |
| Mn 2p (Mn <sup>+4</sup> ) | 642.6      | 9.3   | 642.7     | 10.7  |
| Mn 2p (Mn <sup>+3</sup> ) | 641.1      | 11.2  | 641.1     | 3.4   |
|                           |            | 20.5  |           | 14.1  |
| Co 2p (Co <sup>+3</sup> ) |            |       | 780.4     | 2.4   |
| Co 2p (Co <sup>+2</sup> ) |            |       | 781.0     | 6.0   |
|                           |            |       |           | 8.4   |
| Na 1s                     |            | 8.1   |           |       |

Table S3 :  $q_{\text{total}}$ ,  $q_{\text{external}}$  and  $q_{\text{internal}}$  values (in mAh/g and F/g) determined by Trasatti method in 5M KOH and 0.5M Na<sub>2</sub>SO<sub>4</sub> for Birnessite and Asbolane.

|                   | <b>0.5M Na<sub>2</sub>SO<sub>4</sub></b> |                          |                          | <b>5M KOH</b>            |                          |                           |
|-------------------|------------------------------------------|--------------------------|--------------------------|--------------------------|--------------------------|---------------------------|
|                   | $q_{\text{total}}$                       | $q_{\text{external}}$    | $q_{\text{internal}}$    | $q_{\text{total}}$       | $q_{\text{external}}$    | $q_{\text{internal}}$     |
| <b>Birnessite</b> | 47.5 mAh/g<br>(~156 F/g)                 | 47.5 mAh/g<br>(~156 F/g) | 47.5 mAh/g<br>(~156 F/g) | 3.4 mAh/g<br>(~27 F/g)   | 1.7 mAh/g<br>(~13.5 F/g) | 1.7 mAh/g<br>(~13.5 F/g)  |
| <b>Asbolane</b>   | 31.3 mAh/g<br>(~102 F/g)                 | 15.5 mAh/g<br>(~51 F/g)  | 15.8 mAh/g<br>(~51 F/g)  | 34.5 mAh/g<br>(~276 F/g) | 12.7 mAh/g<br>(~27 F/g)  | 21.8 mAh/g<br>(~13.5 F/g) |
